# Supplementary material for: On-chip magnetic separation and encapsulation of cells in droplets
Source: Royal Society of Chemistry journal article supplement (doi:10.1039/c2lc41201b), 2013-01-01
Supplement: c2lc41201b.pdf [file c2lc41201b.pdf]

## Electronic Supplementary Information: Video Descriptions

### ESI Video 1.avi

**Title:**

On-Chip Separation and Encapsulation of Magnetic Beads into Droplets

**Legend:**

Magnetic beads (7.9  $\mu\text{m}$  diameter) are separated from non-magnetic beads (3.34  $\mu\text{m}$ ) by permalloy disk array under programmable magnetic field to the far right where they are encapsulated in mineral oil.

**Keywords:**

magnetic, bead, separation, encapsulation, droplet, microfluidic, programmable, tweezers, disk, array.

### ESI Video 2.avi

**Title:**

On-Chip Separation and Encapsulation of Magnetically Labeled BT-474 Cells into Droplets

**Legend:**

Magnetically labeled BT-474 cells are separated from unlabeled red blood cells by permalloy disk array under programmable magnetic field to the far right where they are encapsulated in mineral oil.

**Keywords:**

magnetic, labeled, cancer, cell, separation, encapsulation, droplet, microfluidic, disk, array.
